# Supplementary material
Source: PubMed Central journal article supplement (PMC4609265)
Supplement: NIHMS707857-supplement-10071_2015_901_MOESM1_ESM.pdf [file NIHMS707857-supplement-10071_2015_901_MOESM1_ESM.pdf]

Table S1

*Descriptive statistics for dogs that were excluded, and reason for exclusion (N = 11).*

| Dog Name | Breed                | Order | Sex | Dog Type   | Age (years) | Reason for Exclusion                      |
|----------|----------------------|-------|-----|------------|-------------|-------------------------------------------|
| Sahara   | Labrador Retriever   | B     | F   | Pet        | 3           | Experimenter error                        |
| Charlie  | Standard Schnauzer   | A     | M   | Pet        | 6           | Experimenter error                        |
| Duma     | Borzoi               | A     | M   | Pet        | 1           | Abort criteria: Too many no choice trials |
| Izzy     | Mixed: Lab/Chow      | A     | F   | Pet        | 4           | No video                                  |
| Kato     | Mixed: Sheltie       | B     | F   | Pet        | 11          | Abort criteria: Too many no choice trials |
| Simone   | Beagle               | A     | F   | Pet        | 4           | Abort criteria: Too many no choice trials |
| Bella    | Labrador Retriever   | B     | F   | Pet        | 2           | Abort criteria: Too many no choice trials |
| Oscar    | Maltese              | B     | M   | Pet        | 6           | Abort criteria: Too many no choice trials |
| Jordie   | Mixed: Corgi         | A     | F   | Pet        | 3           | Owner interference                        |
| Gia      | Mixed: Border Collie | A     | F   | Pet        | 8           | Abort criteria: Too many no choice trials |
| Wesley   | Labrador Retriever   | B     | M   | Assistance | 2           | Abort criteria: Too many no choice trials |

Increasing arousal enhances inhibitory control in calm but not excitable dogs

*Animal Cognition*

Emily Bray, Evan MacLean, and Brian Hare

University of Pennsylvania; ebray@sas.upenn.edu
